# Supplementary material
Source: PubMed Central journal article supplement (PMC6567838)
Supplement: jamaoncol-5-833-s002.pdf [file jamaoncol-5-833-s002.pdf]

## Supplementary Online Content

Nomura H, Aoki D, Michimae H, et al. Effect of taxane plus platinum regimens vs doxorubicin plus cisplatin as adjuvant chemotherapy for endometrial cancer at a high risk of progression. *JAMA Oncol*. Published online March 21, 2019. doi:10.1001/jamaoncol.2019.0001

**eTable 1.** Baseline patient characteristics

**eTable 2.** Frequency of grade 3 or higher adverse events

This supplementary material has been provided by the authors to give readers additional information about their work.

**eTable 1. Baseline patient characteristics**

| Characteristics                | AP<br>(n=263) |        | DP<br>(n=263) |        | TC<br>(n=262) |        |
|--------------------------------|---------------|--------|---------------|--------|---------------|--------|
|                                | No.           | (%)    | No.           | (%)    | No.           | (%)    |
| Age, years                     |               |        |               |        |               |        |
| Median                         | 58            |        | 59            |        | 59            |        |
| Range                          | 22-74         |        | 29-74         |        | 31-74         |        |
| ECOG performance status        |               |        |               |        |               |        |
| 0                              | 233           | (88.6) | 233           | (88.6) | 217           | (82.8) |
| 1                              | 28            | (10.6) | 27            | (10.3) | 39            | (14.9) |
| 2                              | 0             | (0.0)  | 1             | (0.4)  | 3             | (1.1)  |
| Unknown                        | 2             | (0.8)  | 2             | (0.8)  | 3             | (1.1)  |
| Surgical stage (FIGO 1988)*    |               |        |               |        |               |        |
| IC                             | 54            | (20.5) | 59            | (22.4) | 58            | (22.1) |
| II                             | 26            | (9.9)  | 21            | (8.0)  | 24            | (9.2)  |
| III                            | 167           | (63.5) | 169           | (64.3) | 158           | (60.3) |
| IV                             | 16            | (6.1)  | 14            | (5.3)  | 22            | (8.4)  |
| Histologic type                |               |        |               |        |               |        |
| Endometrioid carcinoma         | 218           | (82.9) | 213           | (81.0) | 202           | (77.1) |
| Serous carcinoma               | 20            | (7.6)  | 17            | (6.5)  | 20            | (7.6)  |
| Clear cell carcinoma           | 7             | (2.7)  | 9             | (3.4)  | 9             | (3.4)  |
| Mucinous carcinoma             | 1             | (0.4)  | 3             | (1.1)  | 3             | (1.1)  |
| Mixed carcinoma                | 9             | (3.4)  | 8             | (3.0)  | 14            | (5.3)  |
| Others                         | 8             | (3.0)  | 13            | (4.9)  | 14            | (5.3)  |
| Histologic grade*              |               |        |               |        |               |        |
| Grade 1                        | 62            | (23.6) | 68            | (25.9) | 61            | (23.3) |
| Grade 2                        | 108           | (41.1) | 98            | (37.3) | 105           | (40.1) |
| Grade 3                        | 71            | (27.0) | 74            | (28.1) | 65            | (24.8) |
| Unknown/Not applicable         | 22            | (8.3)  | 23            | (8.7)  | 31            | (11.8) |
| Lymph node sampling/dissection |               |        |               |        |               |        |
| Pelvic only                    | 99            | (37.6) | 117           | (44.5) | 115           | (43.9) |
| Pelvic and para-aortic         | 162           | (61.6) | 146           | (55.5) | 146           | (55.7) |
| No data                        | 2             | (0.8)  | 0             | (0.0)  | 1             | (0.4)  |

| Size of residual tumor |     |        |     |        |     |        |
|------------------------|-----|--------|-----|--------|-----|--------|
| No residual            | 253 | (96.2) | 253 | (96.2) | 251 | (95.8) |
| < 1cm                  | 5   | (1.9)  | 4   | (1.5)  | 5   | (1.9)  |
| ≥ 1cm                  | 5   | (1.9)  | 6   | (2.3)  | 6   | (2.3)  |

ECOG, Eastern Cooperative Oncology Group; FIGO, International Federation of Gynecology and Obstetrics; AP,

doxorubicin plus cisplatin; DP, docetaxel plus cisplatin; TC, paclitaxel plus carboplatin.

\* Stratification factor.

**eTable 2. Frequency of grade 3 or higher adverse events**

| Adverse event                              | AP<br>(n=261) |        | DP<br>(n=261) |        |             | TC<br>(n=259) |        |             |
|--------------------------------------------|---------------|--------|---------------|--------|-------------|---------------|--------|-------------|
|                                            | No.           | (%)    | No.           | (%)    | p<br>value* | No.           | (%)    | p<br>value* |
| Leukocytes                                 | 218           | (83.5) | 194           | (74.3) | 0.01        | 171           | (66.0) | <0.001      |
| Neutrophils                                | 252           | (96.6) | 233           | (89.3) | <0.01       | 237           | (91.5) | 0.02        |
| Platelets                                  | 33            | (12.6) | 2             | (0.8)  | <0.001      | 50            | (19.3) | 0.04        |
| Hemoglobin                                 | 89            | (34.1) | 44            | (16.9) | <0.001      | 75            | (29.0) | 0.21        |
| Febrile neutropenia                        | 41            | (15.7) | 16            | (6.1)  | <0.01       | 12            | (4.6)  | <0.001      |
| Infection with grade<br>3 or 4 neutrophils | 21            | (8.0)  | 9             | (3.4)  | 0.02        | 6             | (2.3)  | <0.01       |
| ALT                                        | 4             | (1.5)  | 3             | (1.1)  | 0.70        | 6             | (2.3)  | 0.52        |
| Creatinine                                 | 0             | (0.0)  | 2             | (0.8)  | 0.16        | 0             | (0.0)  | --          |
| Allergic reaction                          | 0             | (0.0)  | 4             | (1.5)  | 0.04        | 2             | (0.8)  | 0.16        |
| Anorexia                                   | 19            | (7.3)  | 18            | (6.9)  | 0.86        | 5             | (1.9)  | <0.01       |
| Diarrhea                                   | 2             | (0.8)  | 6             | (2.3)  | 0.15        | 0             | (0.0)  | 0.16        |
| Nausea                                     | 16            | (6.1)  | 13            | (5.0)  | 0.57        | 2             | (0.8)  | <0.01       |
| Vomiting                                   | 15            | (5.7)  | 12            | (4.6)  | 0.55        | 2             | (0.8)  | <0.01       |
| Pain-Muscle                                | 0             | (0.0)  | 0             | (0.0)  | --          | 8             | (3.1)  | <0.01       |
| Neuropathy-motor                           | 0             | (0.0)  | 1             | (0.4)  | 0.32        | 5             | (1.9)  | 0.02        |
| Neuropathy-<br>sensory                     | 0             | (0.0)  | 5             | (1.9)  | 0.03        | 11            | (4.2)  | <0.01       |

NOTE. Classified according to the National Cancer Institute Common Terminology Criteria for Adverse Events (version 3.0).

ALT, alanine transaminase; AP, doxorubicin plus cisplatin; DP, docetaxel plus cisplatin; TC, paclitaxel plus carboplatin.

\* p value with Mantel test compared to AP.
