# Supplementary material
Source: PubMed Central journal article supplement (PMC6567838)
Supplement: jamaoncol-5-833-s003.pdf [file jamaoncol-5-833-s003.pdf]

## **Data Sharing Statement**

Nomura. Effect of Taxane Plus Platinum Regimens vs Doxorubicin Plus Cisplatin as Adjuvant Chemotherapy for Endometrial Cancer at a High Risk of Progression. *JAMA Oncol.* Published March 21, 2019.  
10.1001/jamaoncol.2019.0001

### **Data**

**Data available:** No
